# Supplementary material for: Water-soluble highly fluorinated graphite oxide
Source: Royal Society of Chemistry journal article supplement (doi:10.1039/c3ra45183f), 2013-11-11
Supplement: c3ra45183f.pdf [file c3ra45183f.pdf]

## Supporting information

### Water-soluble Highly Fluorinated Graphite Oxide

Ondřej Jankovský<sup>a</sup>, Petr Šimek<sup>a</sup>, David Sedmidubský<sup>a</sup>, Stanislava Matějková<sup>b</sup>, Zbyněk Janoušek<sup>b</sup>, Filip Šembera<sup>a</sup>, Martin Pumera<sup>c</sup> and Zdeněk Sofer<sup>a,\*</sup>

<sup>a</sup> *Institute of Chemical Technology, Department of Inorganic Chemistry, 166 28 Prague 6, Czech Republic, E-mail: zdenek.sofer@vscht.cz; Fax: +420 22431-0422*

<sup>b</sup> *Institute of Organic Chemistry and Biochemistry AS CR, v.v.i., Flemingovo nam. 2., 166 10 Prague 6, Czech Republic, E-mail: Stanislava.Matejkova@uochb.cas.cz; Fax: +420 220183578*

<sup>c</sup> *Division of Chemistry & Biological Chemistry, School of Physical and Mathematical Sciences, Nanyang Technological University, Singapore, 637371, Singapore. E-mail: pumera@ntu.edu.sg; Fax: +65 6791-1961*

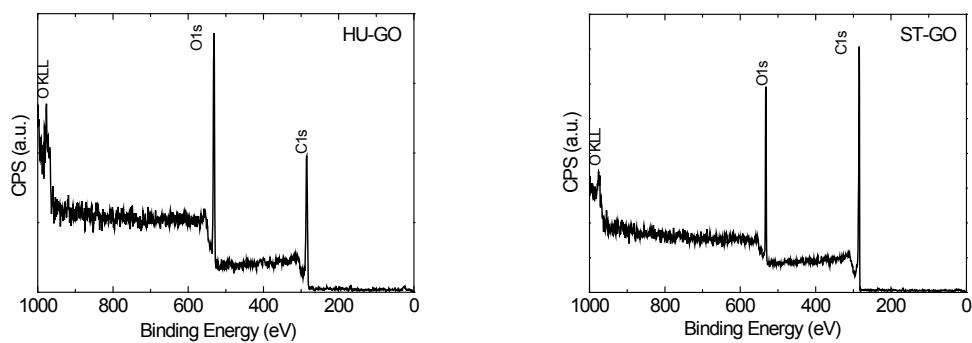

**Figure S1.** Wide-range XPS spectra of graphite oxides ST-GO and HU-GO.

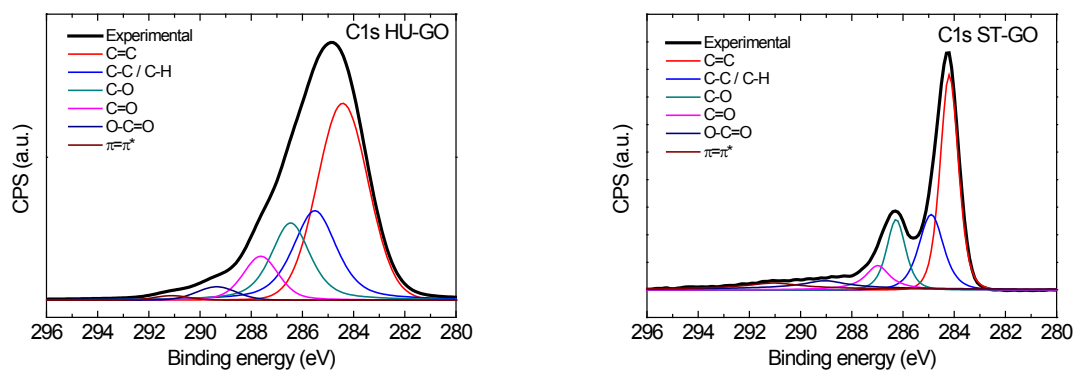

**Figure S2.** Detail of high resolution XPS spectra of graphite oxides C 1s peak for ST-GO and HU-GO samples used for fluorinations.

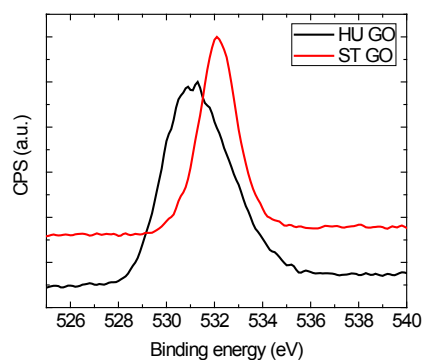

**Figure S3.** Detail of high resolution XPS spectra of graphite oxides O 1s peak for ST-GO and HU-GO samples used for fluorinations.
